# Supplementary material
Source: Springer Nature journal article supplement (https://www.springermedizin.de/resource/supplementary/12885_2014_5135_MOESM7_ESM.pdf/9467904)

**A**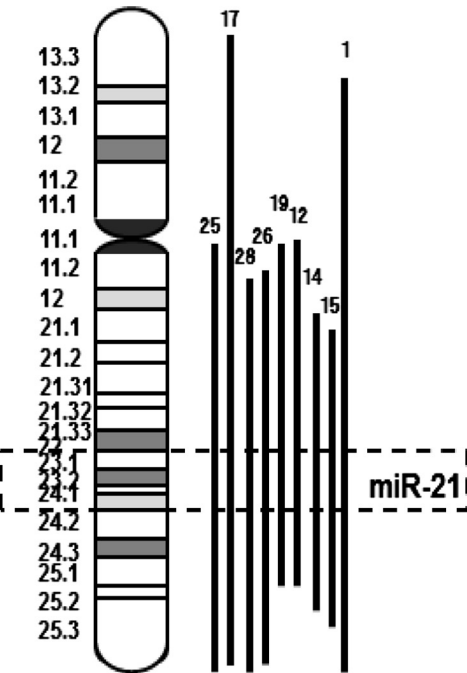**B****miR-21**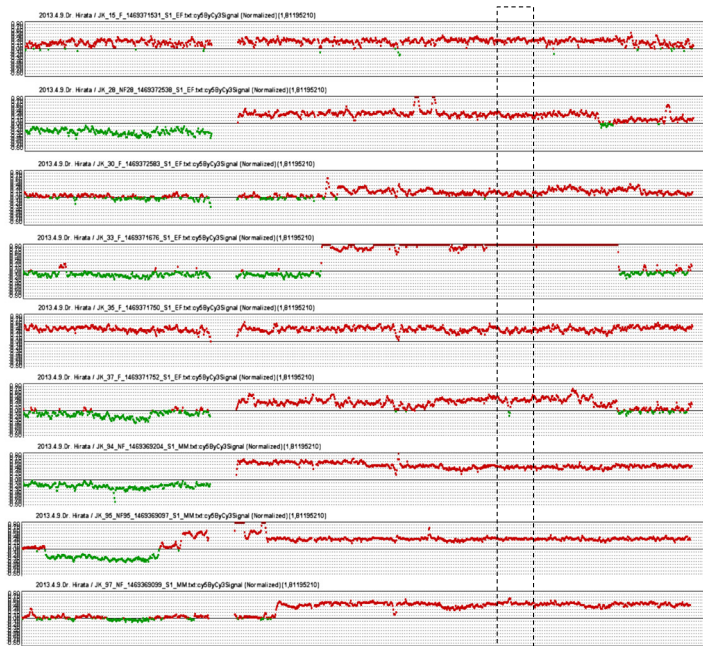

Supplement: MOESM7 [file 9467904]
